# Supplementary material for: The Role of Macrophage Efferocytosis in the Pathogenesis of Apical Periodontitis
Source: MDPI journal article supplement (doi:10.3390/ijms25073854), 2024-03-29
Supplement: s1 [file s1]

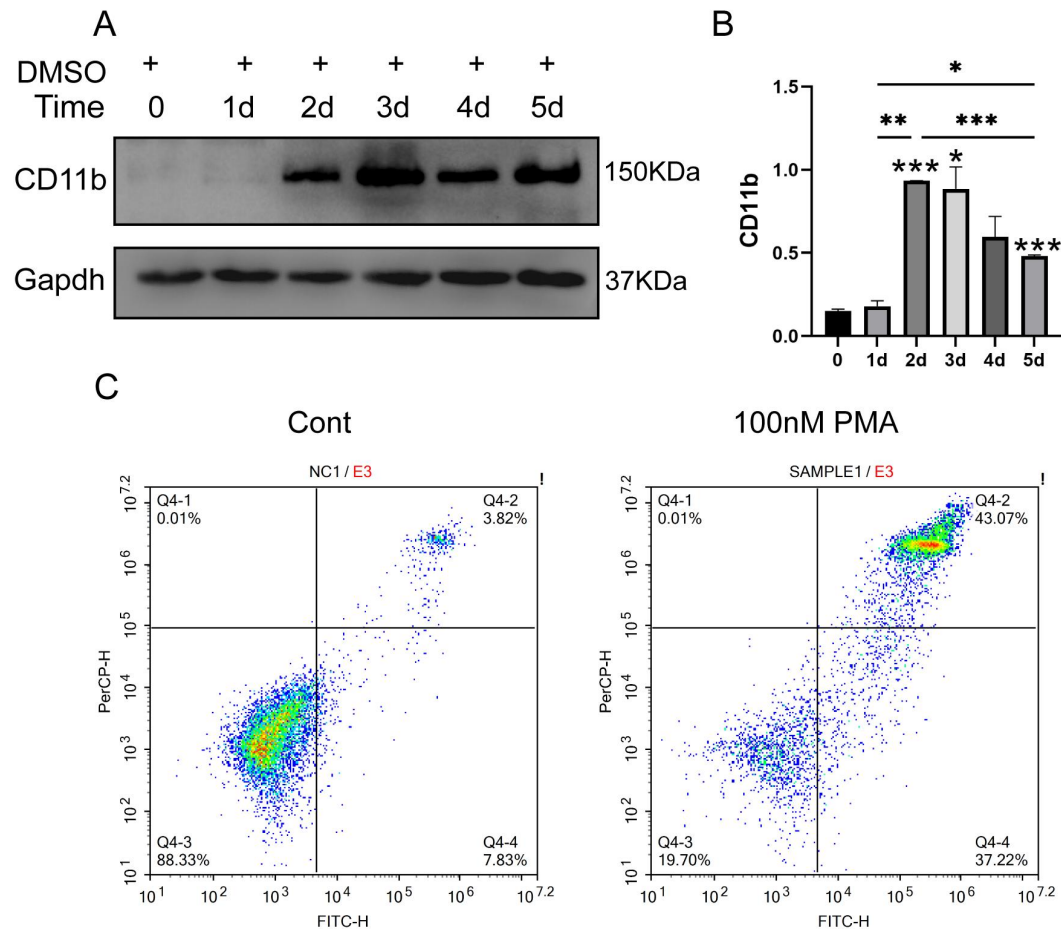

**Supplementary figure 1.** Differentiation of HL-60 cells into neutrophils and the induction of neutrophils apoptosis. (A, B) The expression and quantification of CD11b in HL-60 cells was verified under treatment of 1.3% DMSO in different time point by Western blotting. (C) Measurement of apoptosis in dHL-60 cells under the treatment with 100nM PMA by flow cytometry. The percent of apoptotic cells were the ratio of cell in Q4-2 and Q4-4. \* $P < 0.05$ , \*\* $P < 0.01$ , \*\*\* $P < 0.001$ .
